# Supplementary material for: Artificial intelligence with multi-functional machine learning platform development for better healthcare and precision medicine
Source: Database (Oxford). 2020 Mar 17;2020:baaa010. doi: 10.1093/database/baaa010 (PMC7078068; doi:10.1093/database/baaa010)
Supplement: SupplementaryMaterial_Table_3_baaa010 [file supplementarymaterial_table_3_baaa010.xlsx]

## Sheet: Table 3
Literature / Features	Intelligent interface development	Next-gen radiology and imaging tools development	Global expansion of medical resources	Automated ETL, linkage and data mining in EHR	Risk prediction and containment of antibiotics resistance	Pathology images analysis	AI in machines and medical devices	Smart solutions and methods for cancer treatment	EMR analysis for accurate risk predictors	Wearables devices for monitoring patients health	Smartphone applications as diagnostic tools	AI based clinician decision making	Search engine for healthcare data flow	Data privacy and security	Personalized treatments
Fogel et al, 2018 [31]
Rajkomar et al, 2019 [32]
Nayak et al, 2016 [33]
Jones et al, 2018 [34]
Redekop et al, 2018 [35]
Mesko et al, 2017 [36]
Wahl et al, 2018 [37]
Sitapati et al, 2017 [38]
Jiang et al, 2017 [39]
Emmert-Streib et al, 2019 [40]
Grusona et al, 2019 [41]
Mesko et al, 2018 [42]
Stein et al, 2019 [44]
Kantarjian et al, 2015 [45]
Hersh et al, 2013 [46]
Naylor, 2018 [47]
Hinton, 2018 [48]
Topol, 2019 [49]
Acs et al, 2018 [50]
Rose, 2018 [51]
Cabitza et al, 2017 [52]
Weber et al, 2018 [53]
Wong et al, 2018 [54]
Saheb et al, 2019 [55]
Ngiam et al, 2019 [56]
Abidi et al, 2019 [57]
Char et al, 2018 [58]
Gruson et al, 2019 [59]
Crown, 2019 [60]
Raghupathi et al, 2014 [61]
Azencott, 2018 [62]
Kourou et al, 2015 [63]
